# Supplementary material for: Ecosystems Services Provided by Bats Are at Risk in Brazil
Source: Frontiers journal article supplement (doi:10.3389/fevo.2022.852177), 2022-09-06
Supplement: Data_Sheet_1.docx [file Data_Sheet_1.docx]

Supplementary Material


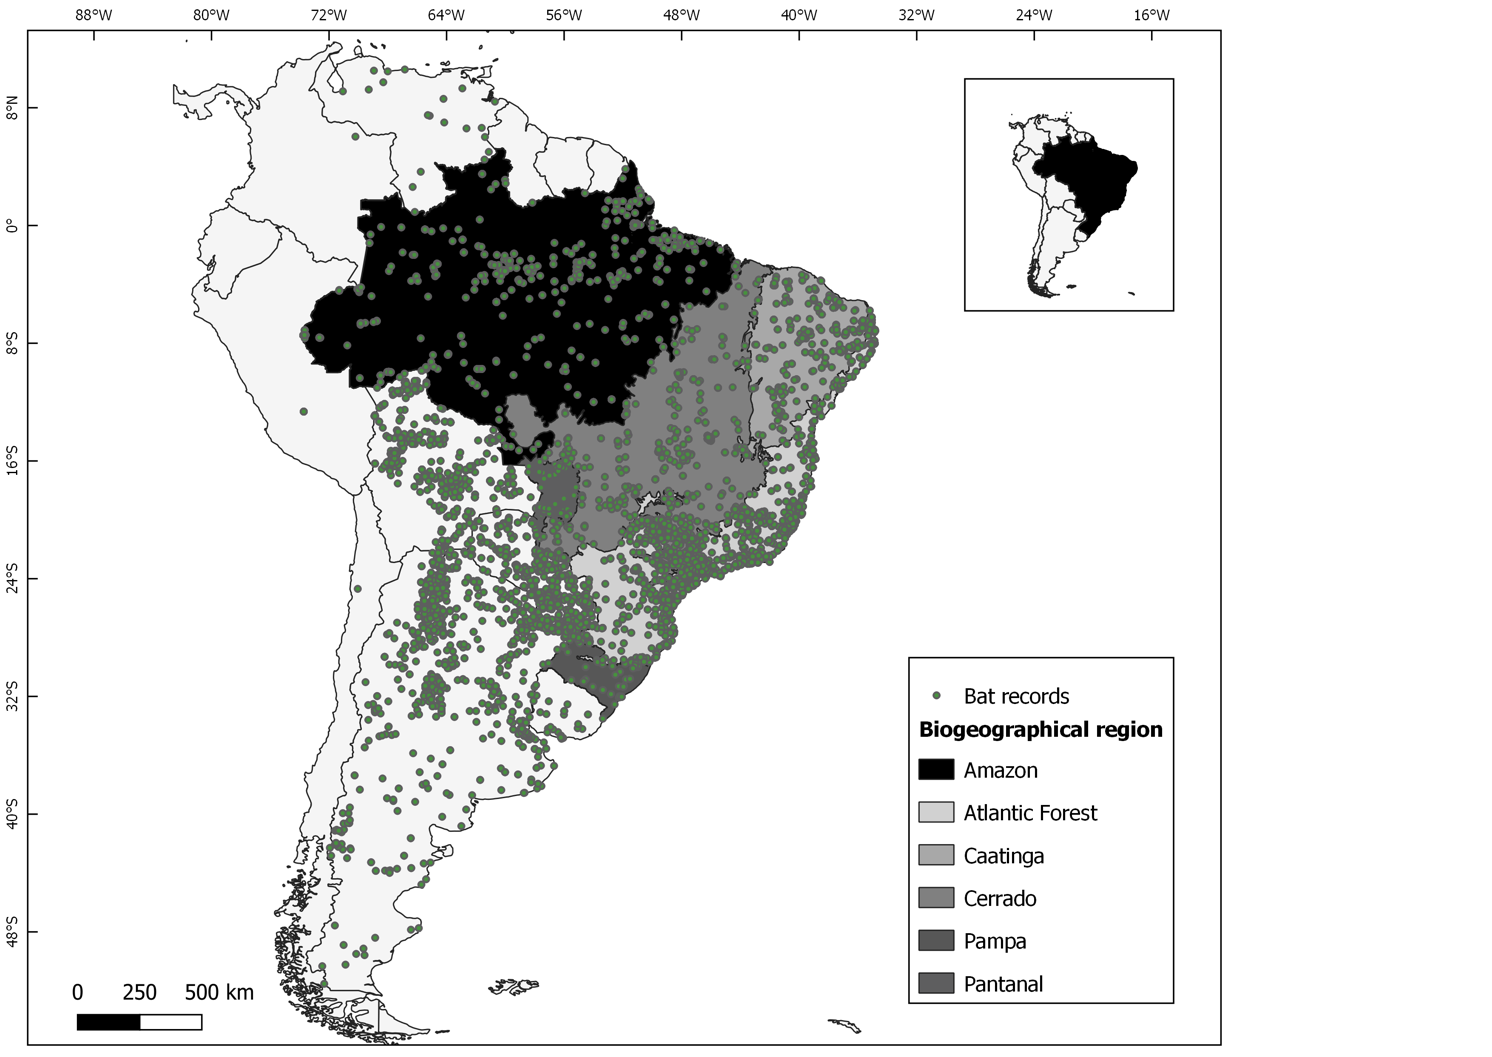


**Figure S1**. Points of occurrence of the Brazilian bat species.

**S2** – R code used for eliminating oversampled regions.

## Ecosystem services provided by bats

## Supplementary material - R code for removing oversampled records

# setwd("set_directory")

# Requirements (install and load)

library(sf)

#library("lwgeom", lib.loc="C:/Program Files/R/R-3.4.4/library")

library(lwgeom)

library(dplyr)

# pt = read.csv("point_dataset.csv", h=T)

pt = read.csv("A.1_Raw_dataset.csv", h=T)

pt = st_as_sf(pt, coords = c("long", "lat"), crs = 4326)

spp = unique(pt$species)

tmp = pt[0,c("species","geometry")]

dist = 0.41 # buffer size (user can specify).

i = 1

for(i in 1:length(spp)){

print(paste("Processando", spp[i]))

spp1 = subset(pt, species == spp[i])

if(nrow(spp1) > 15) {

spp1.buff = st_buffer(spp1,dist = dist)

t = spp1.buff %>% st_union() %>% st_sf() %>% st_cast("POLYGON")

names(t) = "geometry"

st_geometry(t) = "geometry"

id = 1:nrow(t)

t = cbind(id,t)

pt.buff = st_intersection(spp1,t)

x = data.frame(table(pt.buff$id))

dens = as.numeric(x$Freq / st_geod_area(t))

Freq1 = integer(nrow(x))

x = cbind(x,dens,Freq1)

a = which(x$dens <= mean(x$dens))

p=pt.buff[pt.buff$id %in% a,]

tmp = rbind(tmp,p[,c("species","geometry")])

b = which(x$dens > mean(x$dens))

p=pt.buff[pt.buff$id %in% b,]

a = unique(p$id)

b = 1

for(b in 1:length(a)){

p1 = subset(p,id==a[b])

v = mean(x[x$Var1 != a,"dens"])

v1 = x[x$Var1==a[b],"Freq"]

v2 = x[x$Var1==a[b],"dens"]

s = (v * v1) / v2

p1 = p1[sample(s),c("species","geometry")]

tmp = rbind(tmp,p1)

tmp = na.omit(tmp)

}

} else {

tmp = rbind(tmp,spp1[,c("species","geometry")])

}

}

# Write new dataset

# setwd("set_directory")

coord = st_coordinates(tmp)

st_geometry(tmp) = NULL

x = cbind(cbind(tmp,coord))

write.csv(x,"pts_balanced_filter.csv",row.names = F)

**Table S1a**. Correlation index (Pearson method) between temperature derived bioclimatic variables. Green cells indicate pairs of highly correlated variables.

|  | bio1 | bio2 | bio3 | bio4 | bio5 | bio6 | bio7 | bio8 | bio9 |
| --- | --- | --- | --- | --- | --- | --- | --- | --- | --- |
| bio1 | 1,0000 | -0,3287 | 0,6518 | -0,6784 | 0,7403 | 0,9188 | -0,6201 | 0,8328 | 0,9090 |
| bio10 | 0,8752 | -0,1905 | 0,2652 | -0,2472 | 0,9185 | 0,6939 | -0,2610 | 0,8876 | 0,6617 |
| bio11 | 0,9628 | -0,4132 | 0,7941 | -0,8493 | 0,5665 | 0,9645 | -0,7724 | 0,7048 | 0,9577 |
| bio12 | 0,4403 | -0,4360 | 0,4709 | -0,5373 | 0,1080 | 0,5455 | -0,5594 | 0,2219 | 0,4971 |
| bio13 | 0,4887 | -0,3290 | 0,6350 | -0,6870 | 0,0806 | 0,5733 | -0,6068 | 0,2422 | 0,5739 |
| bio14 | 0,0184 | -0,4388 | -0,0634 | 0,0367 | -0,0770 | 0,1440 | -0,2086 | -0,0342 | 0,0272 |
| bio15 | 0,1289 | 0,3155 | 0,3636 | -0,3013 | 0,0249 | 0,0463 | -0,0384 | 0,0867 | 0,1665 |
| bio16 | 0,4952 | -0,3359 | 0,6370 | -0,6929 | 0,0875 | 0,5805 | -0,6111 | 0,2494 | 0,5805 |
| bio17 | 0,0308 | -0,4356 | -0,0625 | 0,0344 | -0,0630 | 0,1519 | -0,2095 | -0,0238 | 0,0355 |
| bio18 | -0,1187 | 0,0070 | -0,2267 | 0,1105 | -0,2184 | -0,1752 | 0,0737 | 0,0427 | -0,2299 |
| bio19 | 0,3695 | -0,5380 | 0,5094 | -0,4093 | 0,0973 | 0,5500 | -0,5706 | 0,1255 | 0,4922 |
| bio2 | -0,3287 | 1,0000 | -0,2525 | 0,4435 | 0,1543 | -0,6137 | 0,7884 | -0,1356 | -0,4456 |
| bio3 | 0,6518 | -0,2525 | 1,0000 | -0,9083 | 0,1646 | 0,7572 | -0,7680 | 0,3032 | 0,7962 |
| bio4 | -0,6784 | 0,4435 | -0,9083 | 1,0000 | -0,0914 | -0,8236 | 0,8859 | -0,3078 | -0,8357 |
| bio5 | 0,7403 | 0,1543 | 0,1646 | -0,0914 | 1,0000 | 0,4803 | 0,0295 | 0,7883 | 0,5145 |
| bio6 | 0,9188 | -0,6137 | 0,7572 | -0,8236 | 0,4803 | 1,0000 | -0,8626 | 0,6398 | 0,9487 |
| bio7 | -0,6201 | 0,7884 | -0,7680 | 0,8859 | 0,0295 | -0,8626 | 1,0000 | -0,2744 | -0,7844 |
| bio8 | 0,8328 | -0,1356 | 0,3032 | -0,3078 | 0,7883 | 0,6398 | -0,2744 | 1,0000 | 0,5623 |
| bio9 | 0,9090 | -0,4456 | 0,7962 | -0,8357 | 0,5145 | 0,9487 | -0,7844 | 0,5623 | 1,0000 |

**Table S1b**. Correlation index (Pearson method) between precipitation derived bioclimatic variables. Green cells indicate pairs of highly correlated variables.

|  | bio10 | bio11 | bio12 | bio13 | bio14 | bio15 | bio16 | bio17 | bio18 | bio19 |
| --- | --- | --- | --- | --- | --- | --- | --- | --- | --- | --- |
| bio1 | 0,875 | 0,962 | 0,440 | 0,4887 | 0,0184 | 0,1289 | 0,4952 | 0,0308 | -0,118 | 0,3695 |
| bio10 | 1,0000 | 0,7208 | 0,2524 | 0,2019 | 0,0774 | -0,0585 | 0,2093 | 0,0919 | -0,1236 | 0,2618 |
| bio11 | 0,7208 | 1,0000 | 0,5214 | 0,6027 | 0,0148 | 0,1854 | 0,6104 | 0,0246 | -0,1378 | 0,4301 |
| bio12 | 0,2524 | 0,5214 | 1,0000 | 0,8711 | 0,5987 | -0,2787 | 0,8892 | 0,6109 | 0,3730 | 0,6674 |
| bio13 | 0,2019 | 0,6027 | 0,8711 | 1,0000 | 0,2112 | 0,1783 | 0,9920 | 0,2181 | 0,2907 | 0,5385 |
| bio14 | 0,0774 | 0,0148 | 0,5987 | 0,2112 | 1,0000 | -0,8029 | 0,2184 | 0,9930 | 0,3644 | 0,5278 |
| bio15 | -0,0585 | 0,1854 | -0,2787 | 0,1783 | -0,8029 | 1,0000 | 0,1573 | -0,8186 | -0,2233 | -0,2781 |
| bio16 | 0,2093 | 0,6104 | 0,8892 | 0,9920 | 0,2184 | 0,1573 | 1,0000 | 0,2259 | 0,2917 | 0,5525 |
| bio17 | 0,0919 | 0,0246 | 0,6109 | 0,2181 | 0,9930 | -0,8186 | 0,2259 | 1,0000 | 0,3713 | 0,5353 |
| bio18 | -0,1236 | -0,1378 | 0,3730 | 0,2907 | 0,3644 | -0,2233 | 0,2917 | 0,3713 | 1,0000 | -0,1714 |
| bio19 | 0,2618 | 0,4301 | 0,6674 | 0,5385 | 0,5278 | -0,2781 | 0,5525 | 0,5353 | -0,1714 | 1,0000 |
| bio2 | -0,1905 | -0,4132 | -0,4360 | -0,3290 | -0,4388 | 0,3155 | -0,3359 | -0,4356 | 0,0070 | -0,5380 |
| bio3 | 0,2652 | 0,7941 | 0,4709 | 0,6350 | -0,0634 | 0,3636 | 0,6370 | -0,0625 | -0,2267 | 0,5094 |
| bio4 | -0,2472 | -0,8493 | -0,5373 | -0,6870 | 0,0367 | -0,3013 | -0,6929 | 0,0344 | 0,1105 | -0,4093 |
| bio5 | 0,9185 | 0,5665 | 0,1080 | 0,0806 | -0,0770 | 0,0249 | 0,0875 | -0,0630 | -0,2184 | 0,0973 |
| bio6 | 0,6939 | 0,9645 | 0,5455 | 0,5733 | 0,1440 | 0,0463 | 0,5805 | 0,1519 | -0,1752 | 0,5500 |
| bio7 | -0,2610 | -0,7724 | -0,5594 | -0,6068 | -0,2086 | -0,0384 | -0,6111 | -0,2095 | 0,0737 | -0,5706 |
| bio8 | 0,8876 | 0,7048 | 0,2219 | 0,2422 | -0,0342 | 0,0867 | 0,2494 | -0,0238 | 0,0427 | 0,1255 |
| bio9 | 0,6617 | 0,9577 | 0,4971 | 0,5739 | 0,0272 | 0,1665 | 0,5805 | 0,0355 | -0,229 | 0,4922 |

Observation:

BIO1 = Annual Mean Temperature

BIO2 = Mean Diurnal Range (Mean of monthly (max temp - min temp))

BIO3 = Isothermality (BIO2/BIO7) (×100)

BIO4 = Temperature Seasonality (standard deviation ×100)

BIO5 = Max Temperature of Warmest Month

BIO6 = Min Temperature of Coldest Month

BIO7 = Temperature Annual Range (BIO5-BIO6)

BIO8 = Mean Temperature of Wettest Quarter

BIO9 = Mean Temperature of Driest Quarter

BIO10 = Mean Temperature of Warmest Quarter

BIO11 = Mean Temperature of Coldest Quarter

BIO12 = Annual Precipitation

BIO13 = Precipitation of Wettest Month

BIO14 = Precipitation of Driest Month

BIO15 = Precipitation Seasonality (Coefficient of Variation)

BIO16 = Precipitation of Wettest Quarter

BIO17 = Precipitation of Driest Quarter

BIO18 = Precipitation of Warmest Quarter

BIO19 = Precipitation of Coldest Quarter

**Table S2**. Bat species recognized to occur in Brazil (Nogueira et al., 2018) with their guild and size information, i.e., forearm (FA) and size class (S = small, M = medium, L = large). Column ‘Model?’ indicates whether a species was successfully modeled. Colum ‘Source’ indicates the reference where the FA information came from (see a list following the table).

| **Seq** | **Family** | **Species** | **Guild** | **FA** | **Size** | **Model?** | **Source** |
| --- | --- | --- | --- | --- | --- | --- | --- |
| 1 | Emballonuridae | *Centronycteris maximiliani* | I | 45.0 | S | Yes | 14 |
| 2 | *Cormura brevirostris* | I | 46.5 | M | Yes | 19 |
| 3 | *Cyttarops alecto* | I | 47.0 | M | No | 27 |
| 4 | *Dicliduris isabella* | I | 59.3 | M | No | 10 |
| 5 | *Diclidurus albus* | I | 66.0 | M | Yes | 16 |
| 6 | *Diclidurus ingens* | I | 71.5 | L | No | 7 |
| 7 | *Dicludurus scutatus* | I | 54.2 | S | No | 16 |
| 8 | *Peropteryx kappleri* | I | 46.0 | M | Yes | 16 |
| 9 | *Peropteryx leucoptera* | I | 45.0 | S | Yes | 18 |
| 10 | *Peropteryx macrotis* | I | 38.3 | S | Yes | 38 |
| 11 | *Peropteryx palidoptera* | I | 41.0 | S | No | 32 |
| 12 | *Peropteryx trinitatis* | I | 39.0 | S | No | 31 |
| 13 | *Rhynchonycteris naso* | I | 37.0 | S | No | 19 |
| 14 | *Saccopteryx bilineata* | I | 46.0 | M | Yes | 19 |
| 15 | *Saccopteryx canescens* | I | 38.0 | S | Yes | 19 |
| 16 | *Saccopteryx gymnura* | I | 34.0 | S | No | 19 |
| 17 | *Saccopteryx leptura* | I | 41.0 | S | Yes | 16 |
| 18 | Furipteridae | *Furipterus horrens* | I | 35.5 | S | Yes | 19 |
| 19 | Molossidae | *Cynomops abrasus* | I | 45.0 | L | Yes | 22 |
| 20 | *Cynomopsr geenhali* | I | 36.0 | M | No | 3 |
| 21 | *Cynomops mastivus* | I | 43.0 | M | No | 22 |
| 22 | *Cynomops milleri* | I | 31.5 | S | No | 3 |
| 24 | *Cynomops planirostris* | I | 30.5 | S | Yes | 8 |
| 25 | *Eumops auripendulus* | I | 61.0 | L | Yes | 3 |
| 26 | *Eumops bonariensis* | I | 48.0 | M | Yes | 3 |
| 27 | *Eumops chimaera* | I | 67.3 | M | No | 12 |
| 28 | *Eumops dabbenei* | I | 76.5 | L | Yes | 19 |
| 29 | *Eumops delticus* | I | 47.6 | M | No | 8 |
| 30 | *Eumops glaucinus* | I | 60.5 | L | Yes | 3 |
| 31 | *Eumops hansae* | I | 39.0 | M | No | 3 |
| 32 | *Eumops maurus* | I | 52.0 | L | No | 3 |
| 33 | *Eumops patagonicus* | I | 54.5 | M | Yes | 11 |
| 34 | *Eumops perotis* | I | 76.5 | L | Yes | 3 |
| 35 | *Eumops trumbulli* | I | 66.5 | L | No | 3 |
| 36 | *Molossops neglectus* | I | 35.5 | M | No | 3 |
| 37 | *Molossops temminckii* | I | 28.5 | S | Yes | 3 |
| 38 | *Molossus aztecus* | I | 38.0 | S | No | 13 |

**Table S3.** Continuation…

| **Seq** | **Family** | **Species** | **Guild** | **FA** | **Size** | **Model?** | **Source** |
| --- | --- | --- | --- | --- | --- | --- | --- |
| 39 |  | *Molossus coibensis* | I | 35.0 | M | No | 3 |
| 40 | *Molossus currentium* | I | 41.5 | M | No | 3 |
| 41 | *Molossus fluminensis* | I | 43.5 | L | No | 38 |
| 42 | *Molossus molossus* | I | 41.5 | L | No | 3 |
| 43 | *Molossus pretiosus* | I | 45.0 | L | No | 3 |
| 44 | *Molossus rufus* | I | 50.0 | L | Yes | 3 |
| 45 | *Neoplatymops mattogrossensis* | I | 30.0 | S | Yes | 3 |
| 46 | *Nyctinomops aurispinosus* | I | 50.5 | L | No | 3 |
| 47 | *Nyctinomops laticaudatus* | I | 44.0 | M | Yes | 3 |
| 48 | *Nyctinomops macrotis* | I | 58.2 | L | Yes | 3 |
| 49 | *Promops centralis* | I | 54.0 | L | Yes | 3 |
| 50 | *Promops nasutus* | I | 48.0 | M | Yes | 3 |
| 51 | *Tadarida brasiliensis* | I | 42.5 | S | Yes | 19 |
| 52 | Mormoopidae | *Pteronotus alitonus* | I | 61.7 | L | No | 29 |
| 54 | *Pteronotus gymnonotus* | I | 52.5 | M | Yes | 3 |
| 55 | *Pteronotus personatus* | I | 44.0 | S | Yes | 3 |
| 56 | *Pteronotus rubiginosus* | I | 63.9 | L | Yes | 29 |
| 57 | Natalidae | *Natalus macrourus* | I | 38.0 | S | Yes | 3 |
| 58 | Noctilionidae | *Noctilio albiventris* | I | 62.0 | L | No | 3 |
| 59 | *Noctilio leporinus* | C | 80.0 | L | Yes | 3 |
| 60 | Phyllostomidae | *Ametrida centurio* | F | 28.5 | S | Yes | 3 |
| 61 | *Anoura caudifer* | N | 35.3 | S | Yes | 3 |
| 62 | *Anoura geoffroyi* | N | 40.3 | S | Yes | 3 |
| 63 | *Artibeus anderseni* | F | 39.0 | S | Yes | 3 |
| 64 | *Artibeus bogotensis* | F | 37.4 | S | No | 42 |
| 65 | *Artibeus cinereus* | F | 38.0 | S | No | 3 |
| 66 | *Artibeus concolor* | F | 47.5 | M | Yes | 3 |
| 67 | *Artibeus fimbriatus* | F | 64.0 | L | Yes | 30 |
| 68 | *Artibeus gnomus* | F | 38.0 | S | Yes | 3 |
| 69 | *Artibeus lituratus* | F | 71.5 | L | Yes | 3 |
| 70 | *Artibeus obscurus* | F | 64.0 | L | Yes | 3 |
| 71 | *Artibeus planirostris* | F | 64.5 | L | Yes | 3 |
| 72 | *Carollia benkeithi* | F | 36.5 | S | Yes | 3 |
| 73 | *Carollia brevicauda* | F | 34.5 | S | Yes | 3 |
| 74 | *Carollia perspicillata* | F | 41.0 | M | No | 3 |
| 75 | *Chiroderma doriae* | F | 52.5 | M | Yes | 28 |
| 76 | *Chiroderma trinitatum* | F | 36.4 | S | Yes | 19 |
| 77 | *Chiroderma villosum* | F | 47.0 | M | Yes | 3 |
| 78 | *Choeroniscus minor* | N | 32.5 | S | Yes | 3 |
| 79 | *Chrotopterus auritus* | C | 82.0 | M | Yes | 3 |

**Table S2.** Continuation…

| **Seq** | **Family** | **Species** | **Guild** | **FA** | **Size** | **Model?** | **Source** |
| --- | --- | --- | --- | --- | --- | --- | --- |
| 80 |  | *Desmodus rotundus* | H | 57.5 | M | No | 3 |
| 81 | *Diaemus youngii* | H | 53.0 | L | No | 19 |
| 82 | *Diphyla ecaudata* | H | 56.0 | S | No | 3 |
| 83 | *Dryadonycteris capixaba* | N | 30.7 | S | No | 6 |
| 84 | *Gardenerycteris crenulatum* | I | 48.0 | M | No | 15 |
| 85 | *Glossophaga comisarisi* | N | 34.5 | S | No | 19 |
| 86 | *Glossophaga longirostris* | N | 38.5 | M | No | 19 |
| 87 | *Glossophaga soricina* | N | 35.5 | S | Yes | 19 |
| 88 | *Glyphonycteris behnii* | I | 47.0 | M | No | 11 |
| 89 | *Glyphonycteris daviesi* | I | 55.5 | M | No | 3 |
| 90 | *Glyphonycteris sylvestris* | I | 40.5 | S | No | 3 |
| 91 | *Hsunycteris pattoni* | N | 32.0 | S | No | 36 |
| 92 | *Hsunycteris thomasi* | N | 32.5 | S | Yes | 19 |
| 93 | *Lampronycteris brachyotis* | I | 41.0 | M | No | 3 |
| 94 | *Lichonycteris degener* | N | 33.0 | S | Yes | 3 |
| 95 | *Lionycteris spurrelli* | N | 35.0 | S | Yes | 3 |
| 96 | *Lonchophylla bokermanni* | N | 38.5 | M | Yes | 5 |
| 97 | *Lonchophylla dekeyseri* | N | 36.9 | M | Yes | 1 |
| 98 | *Lonchophylla inexpectata* | N | 34.2 | S | No | 23 |
| 99 | *Lonchophylla mordax* | N | 33.9 | S | Yes | 19 |
| 100 | *Lonchophylla peracchii* | N | 35.5 | M | No | 34 |
| 101 | *Lonchorhina aurita* | I | 50.5 | M | Yes | 19 |
| 102 | *Lonchorhina inusitata* | I | 54.5 | M | No | 3 |
| 103 | *Lophostoma brasiliense* | I | 34.0 | S | Yes | 3 |
| 104 | *Lophostoma carrikeri* | I | 45.9 | L | No | 3 |
| 105 | *Lophostoma schulzi* | I | 44.0 | M | No | 3 |
| 106 | *Lophostoma silvicola* | I | 54.5 | L | No | 3 |
| 107 | *Macrophyllum macrophyllum* | I | 36.0 | S | Yes | 3 |
| 108 | *Mesophylla macconnelli* | F | 31.5 | S | Yes | 3 |
| 109 | *Micronycteris hirsuta* | I | 43.0 | S | Yes | 3 |
| 110 | *Micronycteris homezorum* | I | 35.5 | S | No | 3 |
| 111 | *Micronycteris megalotis* | I | 34.0 | S | Yes | 3 |
| 112 | *Micronycteris microtis* | I | 34.5 | S | No | 3 |
| 113 | *Micronycteris minuta* | I | 34.0 | S | Yes | 3 |
| 114 | *Micronycteris sanborni* | I | 34.0 | S | Yes | 3 |
| 115 | *Micronycteris schmidtorum* | I | 35.5 | S | Yes | 3 |
| 116 | *Mimon bennettii* | I | 55.0 | M | Yes | 3 |
| 117 | *Neonycteris pusilla* | I | 34.0 | S | No | 3 |
| 118 | *Phylloderma stenops* | I | 74.0 | L | Yes | 3 |

**Table S2.** Continuation…

| **Seq** | **Family** | **Species** | **Guild** | **FA** | **Size** | **Model?** | **Source** |
| --- | --- | --- | --- | --- | --- | --- | --- |
| 119 |  | *Phyllostomus discolor* | I | 62.0 | L | Yes | 3 |
| 120 | *Phyllostomus elongatus* | I | 66.0 | L | No | 3 |
| 121 | *Phyllostomus hastatus* | C | 85.0 | M | Yes | 3 |
| 122 | *Phyllostomus latifolius* | I | 58.5 | L | No | 3 |
| 123 | *Platyrrhinus angustirostris* | F | 37.5 | S | No | 37 |
| 124 | *Platyrrhinus aurarius* | F | 52.5 | M | No | 3 |
| 125 | *Platyrrhinus brachycephalus* | F | 37.5 | S | Yes | 3 |
| 126 | *Platyrrhinus fusciventris* | F | 37.5 | M | No | 3 |
| 127 | *Platyrrhinus incarum* | F | 37.5 | S | Yes | 3 |
| 128 | *Platyrrhinus infuscus* | F | 58.0 | L | Yes | 3 |
| 129 | *Platyrrhinus lineatus* | F | 47.5 | M | Yes | 3 |
| 130 | *Platyrrhinus recifinus* | F | 42.9 | M | Yes | 33 |
| 131 | *Pygoderma bilabiatum* | F | 40.0 | S | Yes | 26 |
| 132 | *Rhinophylla fischerae* | F | 31.5 | S | Yes | 3 |
| 133 | *Rhinophylla pumilio* | F | 34.5 | S | Yes | 3 |
| 134 | *Scleronycteris ega* | N | 34.0 | S | No | 3 |
| 135 | *Sphaeronycteris toxophyllum* | F | 39.5 | M | No | 3 |
| 136 | *Sturnira giannae* | F | 45.0 | M | No | 39 |
| 137 | *Sturnira tildae* | F | 46.0 | M | No | 3 |
| 138 | *Sturnira lilium* | F | 40.5 | S | Yes | 3 |
| 139 | *Sturnira magna* | F | 57.5 | L | No | 3 |
| 140 | *Tonatia bidens* | I | 54.0 | M | Yes | 3 |
| 141 | *Tonatia maresi* | I | 55.0 | M | Yes | 43 |
| 142 | *Trachops cirrhosus* | C | 61.5 | L | No | 3 |
| 143 | *Trinycteris nicefori* | I | 41.0 | S | Yes | 3 |
| 144 | *Uroderma bilobatum* | F | 42.0 | M | No | 3 |
| 145 | *Uroderma magnirostrum* | F | 42.0 | M | Yes | 3 |
| 146 | *Vampyressa pusilla* | F | 33.0 | S | Yes | 3 |
| 147 | *Vampyressa thyone* | F | 33.0 | S | No | 3 |
| 148 | *Vampyriscus bidens* | F | 36.0 | S | Yes | 3 |
| 149 | *Vampyriscus brocki* | F | 32.0 | S | No | 3 |
| 150 | *Vampyrodes caraccioli* | F | 51.5 | M | Yes | 3 |
| 151 | *Vampyrum spectrum* | C | 101.0 | L | Yes | 3 |
| 152 | *Xeronycteris vieirai* | N | 37.2 | M | Yes | 25 |
| 153 | Thyropteridae | *Thryoptera devivoi* | I | 36.5 | S | No | 3 |
| 154 | *Thyroptera discifera* | I | 33.5 | S | Yes | 3 |
| 155 | *Thyroptera lavali* | I | 39.0 | S | No | 8 |
| 156 | *Thyroptera tricolor* | I | 36.5 | S | Yes | 3 |
| 157 | *Thyroptera wynneae* | I | 34.0 | S | No | 3 |
| 158 | Vespertilionidae | *Epitesicus chiriquinus* | I | 45.5 | M | No | 3 |

**Table S2.** Continuation…

| **Seq** | **Family** | **Species** | **Guild** | **FA** | **Size** | **Model?** | **Source** |
| --- | --- | --- | --- | --- | --- | --- | --- |
| 159 |  | *Eptesicus brasiliensis* | I | 43.0 | M | Yes | 35 |
| 160 | *Eptesicus diminutus* | I | 39.5 | S | Yes | 3 |
| 161 | *Eptesicus furinalis* | I | 39.0 | S | Yes | 35 |
| 162 | *Eptesicus taddeii* | I | 46.5 | M | Yes | 21 |
| 163 | *Histiotus alienus* | I | 45.8 | M | No | 41 |
| 164 | *Histiotus diaphanotpterus* | I | 45.4 | M | No | 9 |
| 165 | *Histiotus laephotis* | I | 46.9 | M | Yes | 20 |
| 166 | *Histiotus montanus* | I | 47.7 | M | Yes | 19 |
| 167 | *Histiotus velatus* | I | 46.0 | M | Yes | 3 |
| 168 | *Lasiurus blossevillii* | I | 39.5 | S | Yes | 3 |
| 169 | *Lasiurus castaneus* | I | 45.0 | M | No | 3 |
| 170 | *Lasiurus ebenus* | I | 45.7 | M | No | 4 |
| 171 | *Lasiurus ega* | I | 46.0 | M | Yes | 3 |
| 172 | *Lasiurus egregius* | I | 49.0 | S | No | 3 |
| 173 | *Lasiurus villosissimus* | I | 51.8 | M | Yes | 40 |
| 174 | *Myotis albescens* | I | 34.0 | S | Yes | 3 |
| 175 | *Myotis izecksohni* | I | 37.4 | M | No | 2 |
| 176 | *Myotis lavali* | I | 34.0 | S | No | 2 |
| 177 | *Myotis levis* | I | 40.8 | S | Yes | 24 |
| 178 | *Myotis nigricans* | I | 34.0 | S | Yes | 3 |
| 179 | *Myotis riparius* | I | 34.5 | S | Yes | 3 |
| 180 | *Myotis ruber* | I | 40.0 | S | Yes | 17 |
| 181 | *Myotis simus* | I | 38.5 | S | Yes | 3 |
| 182 | *Rhogeessa hussoni* | I | 29.5 | S | Yes | 3 |
| 183 | *Rhogeessa io* | I | 30.0 | S | No | 3 |

References

1. Aguiar, L.M.S., Bernard, E., and Machado, R.B. (2014). Habitat use and movements of *Glossophaga soricina* and *Lonchophylla dekeyseri* (Chiroptera: Phyllostomidae) in a Neotropical savannah. Zoologia: 31(3), 223-229. doi: http://dx.doi.org/10.1590/S1984-46702014000300003.
2. Barquez, R.M., Miotti, M.D., Idoeta, F.M., and Díaz, M.M. (2107). Two new species of *Myotis* (Chiroptera: Vespertilionidae) for Argentina. Pap. Avulsos Zool. 57(22), 287-294. doi: http://dx.doi.org/10.11606/0031-1049.2017.57.22
3. Baucells-López, A., Rocha, R., Bobrowiec, P., Bernard, E., Palmeirim, J., and Meyer C. (2106). Field Guide to Amazonian Bats. Manaus: Editora INPA.
4. Cláudio, V.C., Novaes, R.L.M., Moratelli, R., and Barbosa, G. (2018). Second record of *Lasiurus ebenus* (Chiroptera, Vespertilionidae), with comments on its taxonomic status. Zootaxa 4403(3), doi: 10.11646/zootaxa.4403.3.5
5. Cláudio, V.C., Silveira, G.C., Farias, S.G., and Maas, A. (). First record of *Lonchophylla bokermanni* (Chiroptera, Phyllostomidae) for the Caatinga biome. Mastozoologia Neotropical 25(1): 43-51. doi: http://dx.doi.org/10.31687/saremMN.18.25.1.0.05.
6. Rocha, P.A., Anderson, F., Dias, D., Mikalauskas, J., Ruiz-Esparza, J., and Ferrari, S.F. (2014). Major Extension of the known range of the Capixaba Nectar-Feeding Bat, *Dryadonycteris capixaba* (Chiroptera, Phyllostomidae). Is This Rare Species Widely Distributed in Eastern Brazil? Mastozzologia Neotropical 21(2), 361-366.
7. Dalponte, J.C., Aguiar, L.M. (2009). The first record of *Diclidurus ingens* Hernandez-Camacho, 1955 (Emballonuridae) in Central Brazil. Biota Neotrop., 9(4), 249-252. doi: http://dx.doi.org/10.1590/S1676-06032009000400025.
8. Diáz, M.M. (2011). New records of bats from the northern region of the Peruvian Amazon. Zoological Research. 32(2), 168−178. doi:10.3724/SP.J.1141.2011.02168.
9. Feijó, A., da Roca, P.A., and Althoff, S.L. (2015). New species of *Histiotus* (Chiroptera: Vespertilionidae) from northeastern Brazil. Zootaxa 4048 (3): 412–427. 2015. doi: http://dx.doi.org/10.11646/zootaxa.4048.3.4
10. Garbino, G.S.T., Aquino, C.C., and Aires, C.C. (2012). Second record of the pale brown ghost bat *Diclidurus isabella* (Thomas, 1920) (Chiroptera, Emballonuridae) from Brazil and range extension into southwestern Brazilian Amazonia. Mammalia 77(2), 231-234. doi: 0.1515/mammalia-2012-0061.
11. Gardner, A.L. (2007). Mammals of South America, Volume 1: Marsupials, Xenarthrans, Shrews, and Bats. University of Chicago Press.
12. Gregorin, R., Martins, L.M., Acosta, L.H., Vasconcellos, K.L., Poma, J.L., dos Santos, F.R., and Paca, R.C.. (2016). A new species of *Eumops* (Chiroptera: Molossidae) from southeastern Brazil and Bolivia. Mammalian Biology 81, 235-246.
13. Gregorin, R., Tahara, A.T., and Buzzato, D.F. (2011). *Molossus aztecus* and other small *Molossus* (Chiroptera: Molossidae) in Brazil. Acta Chiropterologica 13(2):311-317. doi: 10.3161/150811011X624794.
14. Hice, C.L., and Solari, S. (2002). First Record of *Centronycteris maximiliani* (Fischer, 1829) and Two Additional Records of C. centralis (Thomas, 1912) From Peru. Acta Chiropterologica. 4(2), 217-220. doi: 10.3161/001.004.0209.
15. Hurtado, N., Sepúlveda, R.D., and Pacheco, V. (2015). Sexual dimorphism of a sensory structure in a monophormic bat. Acta Chiropterologica, 17(1), 75-83. doi: 10.3161/15081109ACC2015.17.1.006.
16. Jung, K., Kalko, E.K.V., and von Helversen, O. (2006). Echolocation calls in Central American emballonurid bats: signal design and call frequency alternation. Journal of Zoology, 272(2), 125-137. doi:10.1111/j.1469-7998.2006.00250.x
17. Jones, K.E., Bielby, J., Cardillo, M., Fritz, S.A., et al. (2009). PanTHERIA: a species-level database of life history, ecology, and geography of extant and recently extinct mammals. Ecology 90, 2648.
18. McDonough, M.M., Lim, B.K., Ferguson, A.W., Brown, C.M., Burneo, S.F., and Ammerman L.K. (2010). Mammalia, Chiroptera, Emballonuridae, *Peropteryx leucoptera* Peters, 1867 and *Peropteryx pallidoptera* Lim, Engstrom, Reid, Simmons, Voss and Fleck (eds). Distributional range extensions in Ecuador. 2010. Check List. ISSN 1809-127X (online edition).
19. Meng, F., Zhu, L., Huang, W., Irwin, D.M., and Zhang, S. (2016). Bats: Body mass index, forearm mass index, blood glucose levels and SLC2A2 genes for diabetes. Scientific Reports. 6:29960. doi: 10.1038/srep29960
20. Miranda, J.M.D., Azevedo-Barros, M.F.M., and Passos, F.C.. (2007). First record of *Histiotus laephotis* Thomas (Chiroptera, Vespertilionidae) from Brazil. Rev. Bras. Zool. 24 (4), 1188–1191.
21. Miranda, J.M.D., Bernardi, I.P., and Passos, F.C. (2006). A new species of *Eptesicus* (Mammalia: Chiroptera: Vespertilionidae) from the Atlantic Forest, Brazil. Zootaxa 1383, 57–68.
22. Moras, L.M., Tavares, V.C., Pepatp, A., Santos, F.R., and Gregorin, R. (2016). Reassessment of the evolutionary relationships within the dog-faced bats, genus *Cynomops* (Chiroptera: Molossidae). Zoologica Scripta, 1-16. doi: 10.1111/zsc.12169
23. Moratelli, R., and Dias, D. (2015). A new species of nectar-feeding bat, genus *Lonchophylla*, from the Caatinga of Brazil (Chiroptera, Phyllostomidae). ZooKeys 514: 73-91. doi: 10.3897/zookeys.514.10013.
24. Moratelli, R., Peracchi, A.L., Dias, D., and de Oliveira, J.A. (2011). Geographic variation in South American populations of *Myotis nigricans* (Schinz, 1821) (Chiroptera, Vespertilionidae), with the description of two new species. Mammalian Biology, 76, 592-607. doi: 10.1016/j.mambio.2011.01.003
25. Nogueira, M.R., Gregorin, R., and Peracchi, A.L. (2014). Emended diagnosis of *Xeronycteris vieirai* (Mammalia: Chiroptera), with the first record of polyodontia for the genus. Zoologia (Curitiba). 31(2), 175-180. doi: http://dx.doi.org/10.1590/S1984-46702014000200009.
26. Nowak, R.M. (1994). Walker's Bats of the World. The Johns Hopkins University Press. Baltimore, Maryland.
27. Nunes, A., Marques-Aguiar, S.A., Saldanha, N., and Silva, R.S. (2006). On the distribution and rarity of the Neotropical bat *Cyttarops alecto* (Chiroptera, Emballuronidae). Mammalia. 70(1-2). doi: 10.1515/mamm.70.1-2.173.
28. Oprea, M., and Wilson, D.E. (2008). *Chiroderma doriae* (Chiroptera: Phyllostomidae). Mammalian Species, 816(9), 1–7. https://doi.org/10.1644/816.1
29. Pavan, A., Bobrowiec, P., and Percequillo, A.R. (2018). Geographic variation in a South American clade of mormoopid bats, *Pteronotus* (Phyllodia), with description of a new species. Journal of Mammology, 99(3), 624-645. doi: 10.1093/jmammal/gyy048.
30. Rui, A.M., Fabían, M.E., and Menegheti, J.O. (1999). Distribuição geográfica e análise morfológica de *Artibeus lituratus* Olfers e de Artibeus fimbriatus Gray (Chiroptera, Phyllostomidae) no Rio Grande do Sul, Brasil. Rev. Bras. Zool. 16(2), 447-460.
31. Silva dos Santos, A., Silva, D.C., and Faria, K.C. (2016). *Peropteryx trinitatis* Miller, 1899 (Chiroptera, Emballonuridae): first record in central Brazil and revised distribution map. 2016. Check List. 12(6), 1-5. doi: http://dx.doi.org/10.15560/12.6.1992.
32. Suarez-Castro, A.F., Ramírez-Chaves, H., and Rodríguez-Posada, M.E. (2012). new records of *Peropteryx leucoptera* and first record of *Peropteryx pallidoptera* (Chiroptera-Emballonuridae) from Colombia. Mastozoologia Neotropical, 19(1), 165-171.
33. Tavares, V.C., and Velazco, P.M. (2010). *Platyrrhinus recifinus* (Chiroptera: Phyllostomidae). Mammalian Species 42(859, 119-123. doi: 10.1644/859.1
34. Teixeira, T.S.M., Rosa, D.T.C., Dias, D., Cerqueira, R. and Vale, M.M. (2013). First record of *Lonchophylla peracchi* Dias Esberárd and Moratelli 2013 (Chiroptera, Phyllostomidae) in São Paulo State Southeastern, Brazil. Oecologia Australis. 17(3): 424-428. doi: http://dx.doi.org/10.4257/oeco.2013.1703.10.
35. Velazco, P.M., Soto-Centeno, J., Fleck, D.W., Voss, R.S., and Simmons, N.B. (2017). A New Species of Nectar-Feeding Bat of the genus *Hsunycteris* (Phyllostomidae: Lonchophyllinae) from Northeastern Peru. American Museum Novitates, 3881, 1-26. doi: https://doi.org/10.1206/3881.1.
36. Velazco, P.M., Gardner, A. and Patterson, B.D. (2010). Systematics of the *Platyrrhinus* *helleri* species complex (Chiroptera: Phyllostomidae), with descriptions of two new species. Zoological Journal of the Linnean Society, 159, 785–812.
37. Yee, D.A. (2000). *Peropteryx macrotis*. Mammalian Species. 643,1-4.
38. Montani, M.E., Tomasco, I.H., Barberis, I.M., Romano, M.C., Barquez, R.M, and Diaz, M.M. (2021). A new species of *Molossus* (Chiroptera: Molossidae) from Argentina. Journal of Mammalogy, 102(5), 1426-1442. https://doi.org/10.1093/jmammal/gyab078
39. Velazco, P.M. and Patterson, B.D., 2019. Small mammals of the Mayo river basin in northern Peru, with the description of a new species of Sturnira (Chiroptera: Phyllostomidae). Bulletin of the American Museum of Natural History, 2019(429), pp.1-70.
40. Giménez, A.L, and Schiaffini, M.I. (2020). Patagonian bats: new size limits, southernmost localities and updated distribution for *Lasiurus villosissimus* and *Myotis dinellii* (Chiroptera: Vespertilionidae). Mammalia, 84(2), 150-161.
41. Reis, N.R., Peracchi, A.L, Pedro, W.A., and Lima, I.P. (2007). Morcegos do Brasil. Paraná: Univesidade Estadual de Londrina.
42. Calderón, W., and Pacheco, V. (2012). First report of *Artibeus bogotensis* Andersen, 1906 (Chiroptera: Phyllostomidae) for Peru. Check list, 8(6), 1333-1336.
43. Basantes, M., Tinoco, N., Velazco, P.M., Hofmann, M.J., Rodríguez-Posada, M.E., and Camacho MA, (2020(. Systematics and taxonomy of *Tonatia saurophila* Koopman & Williams, 1951 (Chiroptera, Phyllostomidae). ZooKeys, 915, 59.
